# Supplementary material for: Technological Solutions for Human Movement Analysis in Obese Subjects: A Systematic Review
Source: MDPI journal article supplement (doi:10.3390/s23063175), 2023-03-16
Supplement: s1 [file s1]

| <i>Serial number</i> | <i>Reason of exclusion</i> | <i>Reference</i>                                                                                                                                                                                                                                                                                                                                                                                                                                                                   |
|----------------------|----------------------------|------------------------------------------------------------------------------------------------------------------------------------------------------------------------------------------------------------------------------------------------------------------------------------------------------------------------------------------------------------------------------------------------------------------------------------------------------------------------------------|
| 1                    | FULL TEXT NOT AVAILABLE    | Alberton, C. L., Fonseca, B. A., Nunes, G. N., Bergamin, M., & Pinto, S. S. (n.d.). Magnitude of vertical ground reaction force during water-based exercises in women with obesity. <i>SPORTS BIOMECHANICS</i> . <a href="https://doi.org/10.1080/14763141.2021.1872690">https://doi.org/10.1080/14763141.2021.1872690</a>                                                                                                                                                         |
| 2                    | FULL TEXT NOT AVAILABLE    | Almashaqbeh, S., B. Al-Sheikh, W. A. B. Wan Abas, and N. A. Abu Osman. 2015. "Lower Extremities Biomechanics of Regular Stair Climbing: Slim Versus Obese." <i>Biomedical Engineering - Applications, Basis and Communications</i> 27 (4). doi:10.4015/S1016237215500362                                                                                                                                                                                                           |
| 3                    | FULL TEXT NOT AVAILABLE    | Board, W. J., Reynolds, M. M., Ehlen, K., Reiser, R., & Browning, R. C. (2011). The Effects of Obesity on the Biomechanics of Gradient Walking. <i>MEDICINE AND SCIENCE IN SPORTS AND EXERCISE</i> , 43(5), 29–30. <a href="https://doi.org/10.1249/01.MSS.0000402759.22075.75">https://doi.org/10.1249/01.MSS.0000402759.22075.75</a>                                                                                                                                             |
| 4                    | FULL TEXT NOT AVAILABLE    | Bobowik, P., & Wiszomirska, I. (2021). The impact of obesity and age on the risk of falls in elderly women. <i>ACTA OF BIOENGINEERING AND BIOMECHANICS</i> , 23(2), 123–130. <a href="https://doi.org/10.37190/ABB-01804-2021-03">https://doi.org/10.37190/ABB-01804-2021-03</a>                                                                                                                                                                                                   |
| 5                    | FULL TEXT NOT AVAILABLE    | Buckova, K., Lobotková, J., Hirjaková, Z., Bzdúšková, D., & Hlavačka, F. (2014). Postural control assessed by limit of stability in obese adults. <i>Activitas Nervosa Superior Rediviva</i> , 56(3), 87–90. <a href="https://www.scopus.com/inward/record.uri?eid=2-s2.0-84922065099&amp;partnerID=40&amp;md5=f14bf78fa0a07795f1eb368d66839b75">https://www.scopus.com/inward/record.uri?eid=2-s2.0-84922065099&amp;partnerID=40&amp;md5=f14bf78fa0a07795f1eb368d66839b75</a>     |
| 6                    | FULL TEXT NOT AVAILABLE    | Cau, N., Cimolin, V., Brugliera, L., Ventura, G., Galli, M., & Capodaglio, P. (2017). Range of motion limitations of the upper body in obese female workers. <i>MEDICINA DEL LAVORO</i> , 108(6), 455–465. <a href="https://doi.org/10.23749/mdl.v108i6.6339">https://doi.org/10.23749/mdl.v108i6.6339</a>                                                                                                                                                                         |
| 7                    | FULL TEXT NOT AVAILABLE    | Choy, K. R., Sin, S., Tong, Y., Udupa, J. K., Luchtenburg, D. M., Wagshul, M. E., Arens, R., & Wootton, D. M. (2021). Upper airway effective compliance during wakefulness and sleep in obese adolescents studied via two-dimensional dynamic MRI and semiautomated image segmentation. <i>Journal of Applied Physiology (Bethesda, Md. : 1985)</i> , 131(2), 532–543. <a href="https://doi.org/10.1152/jappphysiol.00839.2020">https://doi.org/10.1152/jappphysiol.00839.2020</a> |

|    |                         |                                                                                                                                                                                                                                                                                                                                                                                                               |
|----|-------------------------|---------------------------------------------------------------------------------------------------------------------------------------------------------------------------------------------------------------------------------------------------------------------------------------------------------------------------------------------------------------------------------------------------------------|
| 8  | FULL TEXT NOT AVAILABLE | Cimolin, V., Capodaglio, P., Cau, N., Galli, M., Santovito, C., Patrizi, A., Tringali, G., & Sartorio, A. (2017). Computation of spatio-temporal parameters in level walking using a single inertial system in lean and obese adolescents. <i>Biomedizinische Technik. Biomedical Engineering</i> , 62(5), 505–511. <a href="https://doi.org/10.1515/bmt-2015-0180">https://doi.org/10.1515/bmt-2015-0180</a> |
| 9  | FULL TEXT NOT AVAILABLE | Carvalho, F. R. P., da Conceição Figueira Martins, A. T., & Teixeira, A. M. M. B. (2012). Analyses of gait and jump tasks in female obese adolescents. <i>Pediatric Exercise Science</i> , 24(1), 26–33. <a href="https://doi.org/10.1123/pes.24.1.26">https://doi.org/10.1123/pes.24.1.26</a>                                                                                                                |
| 10 | FULL TEXT NOT AVAILABLE | Sousa, A. L., Gabriel, R., Faria, A. M., Aragao, F. R., & Moreira, M. H. R. (2015). Behavior of temporal parameters of the ground reactive forces for the walking of postmenopausal women. <i>ACTA OF BIOENGINEERING AND BIOMECHANICS</i> , 17(3), 119–127. <a href="https://doi.org/10.5277/ABB-00122-2014-03">https://doi.org/10.5277/ABB-00122-2014-03</a>                                                 |
| 11 | FULL TEXT NOT AVAILABLE | Desrochers, P., Ayoub, M., & Gill, S. (2021). Beyond the Biomechanics: How Knee Factors, Physical Activity, Depressed Mood, and Health Modulate the Relationship Between Obesity and Altered Gait. <i>JOURNAL OF SPORT &amp; EXERCISE PSYCHOLOGY</i> , 43, S26–S26.                                                                                                                                           |
| 12 | FULL TEXT NOT AVAILABLE | Dunias, P., Gransier, R., Jin, A., Statham, A. & Willems, P. 2011, "Wearable human body joint and posture measuring system", <i>BIODEVICES 2011 - Proceedings of the International Conference on Biomedical Electronics and Devices</i> , pp. 268.                                                                                                                                                            |
| 13 | FULL TEXT NOT AVAILABLE | Gupta, M., Dashottar, A., & Borstad, J. D. (2013). Scapula kinematics differ by body mass index. <i>Journal of Applied Biomechanics</i> , 29(4), 380–385. <a href="https://doi.org/10.1123/jab.29.4.380">https://doi.org/10.1123/jab.29.4.380</a>                                                                                                                                                             |
| 14 | FULL TEXT NOT AVAILABLE | Leidecker, E., Kellermann, P., Tiszberger, M.G., Molics, B., Bohner-Beke, A., Nyárády, J. & Kráncz, J. 2016, "Analysis of plantar pressure patterns among obese population", <i>Orvosi hetilap</i> , vol. 157, no. 48, pp. 1919-1925.                                                                                                                                                                         |
| 15 | FULL TEXT NOT AVAILABLE | Merrill, Z., Bova, G., Chambers, A., & Cham, R. (2018). Effect of Trunk Segment Boundary Definitions on Frontal Plane Segment Inertial Calculations. <i>Journal of Applied Biomechanics</i> , 34(3), 232–235. <a href="https://doi.org/10.1123/jab.2016-0319">https://doi.org/10.1123/jab.2016-0319</a>                                                                                                       |
| 16 | FULL TEXT NOT AVAILABLE | Neri, S. G. R., Gadelha, A. B., Correia, A. L. M., Pereira, J. C., de David, A. C., & Lima, R. M. (2017). Obesity is Associated With Altered Plantar Pressure Distribution in Older Women. <i>JOURNAL OF APPLIED BIOMECHANICS</i> , 33(5), 323–329. <a href="https://doi.org/10.1123/jab.2016-0357">https://doi.org/10.1123/jab.2016-0357</a>                                                                 |

|    |                         |                                                                                                                                                                                                                                                                                                                                                                                                                                                                                         |
|----|-------------------------|-----------------------------------------------------------------------------------------------------------------------------------------------------------------------------------------------------------------------------------------------------------------------------------------------------------------------------------------------------------------------------------------------------------------------------------------------------------------------------------------|
| 17 | FULL TEXT NOT AVAILABLE | Papapanagiotou, V., Diou, C., Zhou, L., J, van den B., Mars, M., & Delopoulos, A. (2016). A novel approach for chewing detection based on a wearable PPG sensor. <i>Annual International Conference of the IEEE Engineering in Medicine and Biology Society. IEEE Engineering in Medicine and Biology Society. Annual International Conference, 2016</i> , 6485–6488. <a href="https://doi.org/10.1109/EMBC.2016.7592214">https://doi.org/10.1109/EMBC.2016.7592214</a>                 |
| 18 | FULL TEXT NOT AVAILABLE | Pau, M., Leban, B., & Pau, M. (2013). Alterations in the plantar pressure patterns of overweight and obese schoolchildren due to backpack carriage. <i>Journal of the American Podiatric Medical Association</i> , 103(4), 306–313. <a href="https://doi.org/10.7547/1030306">https://doi.org/10.7547/1030306</a>                                                                                                                                                                       |
| 19 | FULL TEXT NOT AVAILABLE | Prachgosin, T., Chong, D. Y., Leelasamran, W., Smithmaitrie, P., & Chatpun, S. (2015). Medial longitudinal arch biomechanics evaluation during gait in subjects with flexible flatfoot. <i>Acta of Bioengineering and Biomechanics</i> , 17(4), 121–130. <a href="https://pubmed.ncbi.nlm.nih.gov/26898763/">https://pubmed.ncbi.nlm.nih.gov/26898763/</a>                                                                                                                              |
| 20 | FULL TEXT NOT AVAILABLE | Riddiford-Harland, D. L., Steele, J. R., & Baur, L. A. (2011). Medial midfoot fat pad thickness and plantar pressures: are these related in children? <i>International Journal of Pediatric Obesity: IJPO: An Official Journal of the International Association for the Study of Obesity</i> , 6(3), 261–266. <a href="https://doi.org/10.3109/17477166.2011.579974">https://doi.org/10.3109/17477166.2011.579974</a>                                                                   |
| 21 | FULL TEXT NOT AVAILABLE | Sathe, N., & Hiwale, A. (2020). <i>Achieving wellness by monitoring the gait pattern with behavioral intervention for lifestyle diseases</i> doi:10.1007/978-981-32-9343-4_17                                                                                                                                                                                                                                                                                                           |
| 22 | FULL TEXT NOT AVAILABLE | Sazonov, E., Browning, R., Sazonova, N., Schutz, Y., & Hill, J. O. (2010). Classification of Physical Activity and Prediction of Energy Expenditure By a Wearable Shoe Sensor. <i>OBESITY</i> , 18, S82–S82.                                                                                                                                                                                                                                                                            |
| 23 | FULL TEXT NOT AVAILABLE | Shultz SP, Sitler MR, Tierney RT, Hillstrom HJ, Song J. Consequences of pediatric obesity on the foot and ankle complex. <i>J Am Podiatr Med Assoc</i> . 2012 Jan-Feb;102(1):5-12. doi: 10.7547/1020005. PMID: 22232315.                                                                                                                                                                                                                                                                |
| 24 | FULL TEXT NOT AVAILABLE | Silva L., M, B. J., Rattes, C. S., Sayão, L. B., Reinaux, C. A., Campos, S. L., Brandão, D. C., Fregonezi, G., Aliverti, A., & A, D. de A. (2015). The influence of supine posture on chest wall volume changes is higher in obese than in normal weight children. <i>Applied Physiology, Nutrition, and Metabolism = Physiologie Appliquee, Nutrition et Metabolisme</i> , 40(2), 178–183. <a href="https://doi.org/10.1139/apnm-2014-0201">https://doi.org/10.1139/apnm-2014-0201</a> |
| 25 | FULL TEXT NOT AVAILABLE | Singh, B., Francis, S. L., Janz, K. F., & Yack, H. J. (2014). Effect Of Cardiorespiratory Fitness And Fatigue On Gait Biomechanics In Obese Children? <i>MEDICINE AND</i>                                                                                                                                                                                                                                                                                                               |

|    |                         |                                                                                                                                                                                                                                                                                                                                                                                                                                                                  |
|----|-------------------------|------------------------------------------------------------------------------------------------------------------------------------------------------------------------------------------------------------------------------------------------------------------------------------------------------------------------------------------------------------------------------------------------------------------------------------------------------------------|
|    |                         | SCIENCE IN SPORTS AND EXERCISE, 46(5), 443–443.<br><a href="https://doi.org/10.1249/01.mss.0000494787.39415.64">https://doi.org/10.1249/01.mss.0000494787.39415.64</a>                                                                                                                                                                                                                                                                                           |
| 26 | FULL TEXT NOT AVAILABLE | Singh, B., Niino, M. F., Goulart, J. D., & Hammons, A. (2018). Effect Of Cardiorespiratory Fitness, Fatigue And Muscular Strength On Gait Biomechanics In Obese Children. <i>MEDICINE AND SCIENCE IN SPORTS AND EXERCISE</i> , 50(5), 509–509.                                                                                                                                                                                                                   |
| 27 | FULL TEXT NOT AVAILABLE | Sterner, J. A., Reaves, S. K., Aguinaldo, A. L., Hazelwood, S. J., & Klisch, S. M. (2022). Inverse dynamics analysis of youth pitching arm kinetics using body composition imaging. <i>SPORTS BIOMECHANICS</i> , 21(9), 993–1007.<br><a href="https://doi.org/10.1080/14763141.2020.1715470">https://doi.org/10.1080/14763141.2020.1715470</a>                                                                                                                   |
| 28 | FULL TEXT NOT AVAILABLE | Ugbolue, U. C., Yates, E. L., Rowland, K. E., Wearing, S. C., Gu, Y., Lam, W. K., Baker, J. S., Sculthorpe, N. F., & Dutheil, F. (2021). A novel simplified biomechanical assessment of the heel pad during foot plantarflexion. <i>Proceedings of the Institution of Mechanical Engineers. Part H, Journal of Engineering in Medicine</i> , 235(2), 197–207.<br><a href="https://doi.org/10.1177/0954411920971069">https://doi.org/10.1177/0954411920971069</a> |
| 29 | FULL TEXT NOT AVAILABLE | Wang, W., Wang, D. M., & Lai, C. H. (2018). THE THREE-DIMENSIONAL MOVEMENT CORRELATIONS BETWEEN ELBOW AND WRIST JOINT AND ANTHROPOMETRIC DETERMINANTS. <i>JOURNAL OF MECHANICS IN MEDICINE AND BIOLOGY</i> , 18(2). <a href="https://doi.org/10.1142/S0219519418500136">https://doi.org/10.1142/S0219519418500136</a>                                                                                                                                            |
| 30 | FULL TEXT NOT AVAILABLE | Yang, H., Fu, C., He, R., & Ma, G. (2022). Impact of overweight and obesity on knee joint biomechanics during running in children. <i>Chinese Journal of School Health</i> , 43(4), 570–577. <a href="https://doi.org/10.16835/j.cnki.1000-9817.2022.04.021">https://doi.org/10.16835/j.cnki.1000-9817.2022.04.021</a>                                                                                                                                           |
| 31 | FULL TEXT NOT AVAILABLE | Zdrodowska, A., Wiszomirska, I., Kaczmarczyk, K., & Kosmol, A. (2018). Effects of anthropometric factors on postural stability in individuals with hearing impairment. <i>ACTA OF BIOENGINEERING AND BIOMECHANICS</i> , 20(1), 109–115.<br><a href="https://doi.org/10.5277/ABB-01014-2017-024">https://doi.org/10.5277/ABB-01014-2017-024</a>                                                                                                                   |
| 32 | FULL TEXT NOT AVAILABLE | Zhang, T., Tang, W., & Sazonov, E. S. (2012). Classification of posture and activities by using decision trees. <i>Annual International Conference of the IEEE Engineering in Medicine and Biology Society. IEEE Engineering in Medicine and Biology Society. Annual International Conference</i> , 2012, 4353–4356.<br><a href="https://doi.org/10.1109/EMBC.2012.6346930">https://doi.org/10.1109/EMBC.2012.6346930</a>                                        |

|    |                                                           |                                                                                                                                                                                                                                                                                                                                                                                                                                                                                               |
|----|-----------------------------------------------------------|-----------------------------------------------------------------------------------------------------------------------------------------------------------------------------------------------------------------------------------------------------------------------------------------------------------------------------------------------------------------------------------------------------------------------------------------------------------------------------------------------|
| 33 | POPULATION NOT STRATIFIED OR<br>BMI <30 Kg/m <sup>2</sup> | Ahsan M. Determine the kinematics and kinetics parameters associated with bilateral gait patterns among healthy, overweight, and obese adults. <i>Acta Biomed.</i> 2022 Oct 26;93(5):e2022228. doi: 10.23750/abm.v93i5.13060. PMID: 36300229; PMCID: PMC9686171.                                                                                                                                                                                                                              |
| 34 | POPULATION AFFECTED BY<br>PATHOLOGIES OR PAIN             | Al Khatib F, Gouissem A, Mbarki R, Adouni M. Biomechanical Characteristics of the Knee Joint during Gait in Obese versus Normal Subjects. <i>Int J Environ Res Public Health.</i> 2022 Jan 16;19(2):989. doi: 10.3390/ijerph19020989. PMID: 35055810; PMCID: PMC8775559.                                                                                                                                                                                                                      |
| 35 | POPULATION <18 YEARS                                      | Allam HH, Muhsen A, Al-Walah MA, Alotaibi AN, Alotaibi SS, Elsayyad LK. Effects of Plyometric Exercises versus Flatfoot Corrective Exercises on Postural Control and Foot Posture in Obese Children with a Flexible Flatfoot. <i>Appl Bionics Biomech.</i> 2021 Oct 31;2021:3635660. doi: 10.1155/2021/3635660. PMID: 34754329; PMCID: PMC8572602.                                                                                                                                            |
| 36 | FOCUSED ON POSTURE OR BALANCE<br>OR PLANTAR PRESSURE      | Ameer, Mariam A., Alanazi, Munirah S., Alhabbad, Abeer S., Alabas, Ahlam M., Al-Ruwaili, Raghad R., AL-Ruwaili, Saba F., Al-Aljubab, Wasan K., Al-Ruwaili, Taif F., Al-awwad, Ethar I. and Al-Abbad, Ammar M.. "Influence of obesity on spatiotemporal gait parameters among female students from Jouf University, Saudi Arabia" <i>Biomedical Human Kinetics</i> , vol.14, no.1, 2022, pp.127-134. <a href="https://doi.org/10.2478/bhk-2022-0016">https://doi.org/10.2478/bhk-2022-0016</a> |
| 37 | FOCUSED ON POSTURE OR BALANCE<br>OR PLANTAR PRESSURE      | Bacha IL, Benetti FA, Greve JM. Baropodometric analyses of patients before and after bariatric surgery. <i>Clinics (Sao Paulo).</i> 2015 Nov;70(11):743-7. doi: 10.6061/clinics/2015(11)05. PMID: 26602521; PMCID: PMC4642488.                                                                                                                                                                                                                                                                |
| 38 | POPULATION AFFECTED BY<br>PATHOLOGIES OR PAIN             | Blazek K, Asay JL, Erhart-Hledik J, Andriacchi T. Adduction moment increases with age in healthy obese individuals. <i>J Orthop Res.</i> 2013 Sep;31(9):1414-22. doi: 10.1002/jor.22390. Epub 2013 Jun 4. PMID: 23737249.                                                                                                                                                                                                                                                                     |
| 39 | POPULATION NOT STRATIFIED OR<br>BMI <30 kg/m <sup>2</sup> | Bartels W, Demol J, Gelaude F, Jonkers I, Vander Sloten J. Computed tomography-based joint locations affect calculation of joint moments during gait when compared to scaling approaches. <i>Comput Methods Biomech Biomed Engin.</i> 2015 Aug;18(11):1238-1251. doi: 10.1080/10255842.2014.890186. Epub 2014 Mar 18. PMID: 24641349.                                                                                                                                                         |
| 40 | INSTRUMENTATION NOT SPECIFIED                             | Bollinger LM, Walaszek MC, Seay RF, Ransom AL. Knee extensor torque and BMI differently relate to sit-to-stand strategies in obesity. <i>Clin Biomech (Bristol, Avon).</i>                                                                                                                                                                                                                                                                                                                    |

|    |                                                           |                                                                                                                                                                                                                                                                                                                                        |
|----|-----------------------------------------------------------|----------------------------------------------------------------------------------------------------------------------------------------------------------------------------------------------------------------------------------------------------------------------------------------------------------------------------------------|
|    |                                                           | 2019 Feb;62:28-33. doi: 10.1016/j.clinbiomech.2019.01.002. Epub 2019 Jan 12. PMID: 30660055.                                                                                                                                                                                                                                           |
| 41 | POPULATION NOT STRATIFIED OR<br>BMI <30 kg/m <sup>2</sup> | Bonci T, Camomilla V, Dumas R, Chèze L, Cappozzo A. A soft tissue artefact model driven by proximal and distal joint kinematics. J Biomech. 2014 Jul 18;47(10):2354-61. doi: 10.1016/j.jbiomech.2014.04.029. Epub 2014 Apr 26. PMID: 24818796.                                                                                         |
| 42 | SURGICAL INTERVENTION                                     | Bonnefoy-Mazure A, Martz P, Armand S, Sagawa Y Jr, Suva D, Turcot K, Miozzari HH, Lübbecke A. Influence of Body Mass Index on Sagittal Knee Range of Motion and Gait Speed Recovery 1-Year After Total Knee Arthroplasty. J Arthroplasty. 2017 Aug;32(8):2404-2410. doi: 10.1016/j.arth.2017.03.008. Epub 2017 Mar 16. PMID: 28545773. |
| 43 | POPULATION NOT STRATIFIED OR<br>BMI <30 kg/m <sup>2</sup> | Borhani M, McGregor AH, Bull AM. An alternative technical marker set for the pelvis is more repeatable than the standard pelvic marker set. Gait Posture. 2013 Sep;38(4):1032-7. doi: 10.1016/j.gaitpost.2013.05.019. Epub 2013 Jun 19. PMID: 23790572; PMCID: PMC3989066.                                                             |
| 44 | POPULATION <18 YEARS                                      | Briggs MS, Spech C, King R, McNally M, Paponetti M, Bout-Tabaku S, Schmitt L. Obese Youth Demonstrate Altered Landing Knee Mechanics Unrelated to Lower-Extremity Peak Torque When Compared With Healthy Weight Youth. J Appl Biomech. 2021 Apr 1;37(2):109-117. doi: 10.1123/jab.2020-0013. Epub 2021 Jan 15. PMID: 33450728.         |
| 45 | FOCUSED ON POSTURE OR BALANCE<br>OR PLANTAR PRESSURE      | Caderby T, Caron N, Verkindt C, Bonazzi B, Dalleau G, Peyrot N. Obesity-related alterations in anticipatory postural mechanisms associated with gait initiation. Exp Brain Res. 2020 Nov;238(11):2557-2567. doi: 10.1007/s00221-020-05914-8. Epub 2020 Sep 2. PMID: 32876708.                                                          |
| 46 | FOCUSED ON POSTURE OR BALANCE<br>OR PLANTAR PRESSURE      | Castro M, Abreu S, Sousa H, Machado L, Santos R, Vilas-Boas JP. Ground reaction forces and plantar pressure distribution during occasional loaded gait. Appl Ergon. 2013 May;44(3):503-9. doi: 10.1016/j.apergo.2012.10.016. Epub 2012 Nov 16. PMID: 23157973                                                                          |
| 47 | FOCUSED ON POSTURE OR BALANCE<br>OR PLANTAR PRESSURE      | Cau N, Cimolin V, Galli M, Precilios H, Tacchini E, Santovito C, Capodaglio P. Center of pressure displacements during gait initiation in individuals with obesity. J Neuroeng Rehabil. 2014 May 7;11:82. doi: 10.1186/1743-0003-11-82. PMID: 24885764; PMCID: PMC4026057.                                                             |

|    |                                                        |                                                                                                                                                                                                                                                                                                                                                                          |
|----|--------------------------------------------------------|--------------------------------------------------------------------------------------------------------------------------------------------------------------------------------------------------------------------------------------------------------------------------------------------------------------------------------------------------------------------------|
| 48 | PUBLICATION TYPE                                       | G. Cesarelli, L. Donisi, G. Di Caprio, M. Scioli, A. Biancardi and G. D'Addio, "Statistical correlation analysis between kinematic features and clinical indexes and scales for obese patients," <i>2021 IEEE International Symposium on Medical Measurements and Applications (MeMeA)</i> , Lausanne, Switzerland, 2021, pp. 1-5, doi: 10.1109/MeMeA52024.2021.9478776. |
| 49 | FOCUSED ON POSTURE OR BALANCE OR PLANTAR PRESSURE      | Chambers AJ, Sukits AL, McCrory JL, Cham R. The effect of obesity and gender on body segment parameters in older adults. <i>Clin Biomech (Bristol, Avon)</i> . 2010 Feb;25(2):131-6. doi: 10.1016/j.clinbiomech.2009.10.015. Epub 2009 Dec 11. PMID: 20005028; PMCID: PMC2820296                                                                                         |
| 50 | POPULATION NOT STRATIFIED OR BMI <30 kg/m <sup>2</sup> | Chehab EF, Andriacchi TP, Favre J. Speed, age, sex, and body mass index provide a rigorous basis for comparing the kinematic and kinetic profiles of the lower extremity during walking. <i>J Biomech</i> . 2017 Jun 14;58:11-20. doi: 10.1016/j.jbiomech.2017.04.014. Epub 2017 Apr 20. PMID: 28501342                                                                  |
| 51 | POPULATION NOT STRATIFIED OR BMI <30 kg/m <sup>2</sup> | Choi H, Lim J, Lee S. Body fat-related differences in gait parameters and physical fitness level in weight-matched male adults. <i>Clin Biomech (Bristol, Avon)</i> . 2021 Jan;81:105243. doi: 10.1016/j.clinbiomech.2020.105243. Epub 2020 Dec 8. PMID: 33309933.                                                                                                       |
| 52 | SURGICAL INTERVENTION                                  | Christensen JC, Capin JJ, Hinrichs LA, Aljehani M, Stevens-Lapsley JE, Zeni JA. Gait mechanics are influenced by quadriceps strength, age, and sex after total knee arthroplasty. <i>J Orthop Res</i> . 2021 Jul;39(7):1523-1532. doi: 10.1002/jor.24878. Epub 2020 Nov 2. PMID: 33034899; PMCID: PMC8635453.                                                            |
| 53 | FOCUSED ON POSTURE OR BALANCE OR PLANTAR PRESSURE      | Cibulková N, Daďová K, Mašková K, Busch A, Kobesová A, Vařeková J, Hašpicová M, Matoulek M. Bariatric surgery and exercise: A pilot study on postural stability in obese individuals. <i>PLoS One</i> . 2022 Jan 14;17(1):e0262651. doi: 10.1371/journal.pone.0262651. PMID: 35030216; PMCID: PMC8759698.                                                                |
| 54 | FOCUSED ON POSTURE OR BALANCE OR PLANTAR PRESSURE      | Cieślińska-Świder J, Furmanek MP, Błaszczyk JW. The influence of adipose tissue location on postural control. <i>J Biomech</i> . 2017 Jul 26;60:162-169. doi: 10.1016/j.jbiomech.2017.06.027. Epub 2017 Jun 27. PMID: 28705486.                                                                                                                                          |
| 55 | POPULATION <18 YEARS                                   | Cilli M, Serbest K, Kayaoglu E. The effect of body weight on joint torques in teenagers: Investigation of sit-to-stand movement. <i>Clinical Biomechanics</i> , Volume 83, 2021, 105288, ISSN 0268-0033, <a href="https://doi.org/10.1016/j.clinbiomech.2021.105288">https://doi.org/10.1016/j.clinbiomech.2021.105288</a> .                                             |

|    |                                                   |                                                                                                                                                                                                                                                                                                                                                                         |
|----|---------------------------------------------------|-------------------------------------------------------------------------------------------------------------------------------------------------------------------------------------------------------------------------------------------------------------------------------------------------------------------------------------------------------------------------|
| 56 | POPULATION AFFECTED BY PATHOLOGIES OR PAIN        | Cimolin V, Vismara L, Galli M, Grugni G, Cau N, Capodaglio P. Gait strategy in genetically obese patients: a 7-year follow up. <i>Res Dev Disabil.</i> 2014 Jul;35(7):1501-6. doi: 10.1016/j.ridd.2014.04.005. Epub 2014 Apr 21. PMID: 24763375.                                                                                                                        |
| 57 | FOCUSED ON POSTURE OR BALANCE OR PLANTAR PRESSURE | Clarkson S, Flint SW, Broom DR, Capehorn M, Wheat J. 3D surface-imaging for volumetric measurement in people with obesity. <i>Technol Health Care.</i> 2018;26(2):363-369. doi: 10.3233/THC-171138. PMID: 29332058.                                                                                                                                                     |
| 58 | POPULATION <18 YEARS                              | Collado-Mateo, D.; Domínguez-Muñoz, F.J.; Adsuar, J.C.; Parraca, J.A.; Tomas-Carus, P.; Garcia-Gordillo, M.Á.; Raimundo, A.M. Test-Retest Intra-Session Reliability of Isokinetic Knee Strength Measurements in Obese Children. <i>Appl. Sci.</i> <b>2020</b> , <i>10</i> , 5923. <a href="https://doi.org/10.3390/app10175923">https://doi.org/10.3390/app10175923</a> |
| 59 | POPULATION <18 YEARS                              | D'Hondt E, Segers V, Deforche B, Shultz SP, Tanghe A, Gentier I, De Bourdeaudhuij I, De Clercq D, Lenoir M. The role of vision in obese and normal-weight children's gait control. <i>Gait Posture.</i> 2011 Feb;33(2):179-84. doi: 10.1016/j.gaitpost.2010.10.090. Epub 2010 Nov 20. PMID: 21094609.                                                                   |
| 60 | SURGICAL INTERVENTION                             | De Pieri E, Lunn DE, Chapman GJ, Rasmussen KP, Ferguson SJ, Redmond AC. Patient characteristics affect hip contact forces during gait. <i>Osteoarthritis and Cartilage.</i> Volume 27, Issue 6, 2019, Pages 895-905, ISSN 1063-4584, <a href="https://doi.org/10.1016/j.joca.2019.01.016">https://doi.org/10.1016/j.joca.2019.01.016</a> .                              |
| 61 | SURGICAL INTERVENTION                             | DeVita P, Rider P, Hortobágyi T. Reductions in knee joint forces with weight loss are attenuated by gait adaptations in class III obesity. <i>Gait Posture.</i> 2016 Mar;45:25-30. doi: 10.1016/j.gaitpost.2015.12.040. Epub 2016 Jan 6. PMID: 26979878.                                                                                                                |
| 62 | FOCUSED ON POSTURE OR BALANCE OR PLANTAR PRESSURE | Desrochers PC, Kim D, Keegan L, Gill SV. Association between the Functional Gait Assessment and spatiotemporal gait parameters in individuals with obesity compared to normal weight controls: A proof-of-concept study. <i>J Musculoskelet Neuronal Interact.</i> 2021 Sep 1;21(3):335-342. PMID: 34465671; PMCID: PMC8426657.                                         |
| 63 | FOCUSED ON POSTURE OR BALANCE OR PLANTAR PRESSURE | Diniz-Sousa F, Veras L, Boppre G, Devezas V, Santos-Sousa H, Preto J, Machado L, Vilas-Boas JP, Oliveira J, Fonseca H. How Does Bariatric Surgery Affect Fall Risk Factors? <i>Obes Surg.</i> 2021 Aug;31(8):3506-3513. doi: 10.1007/s11695-021-05400-2. Epub 2021 Apr 2. PMID: 33797733.                                                                               |
| 64 | OTHER FOCUS                                       | Diniz-Sousa F, Veras L, Ribeiro JC, Boppre G, Devezas V, Santos-Sousa H, Preto J, Machado L, Vilas-Boas JP, Oliveira J, Fonseca H. Accelerometry calibration in people with class II-III obesity: Energy expenditure prediction and physical activity                                                                                                                   |



|    |                                                        |                                                                                                                                                                                                                                                                                                                                          |
|----|--------------------------------------------------------|------------------------------------------------------------------------------------------------------------------------------------------------------------------------------------------------------------------------------------------------------------------------------------------------------------------------------------------|
|    |                                                        | intensity identification. <i>Gait &amp; Posture</i> , Volume 76, 2020, Pages 104-109, ISSN 0966-6362, <a href="https://doi.org/10.1016/j.gaitpost.2019.11.008">https://doi.org/10.1016/j.gaitpost.2019.11.008</a> .                                                                                                                      |
| 65 | OTHER FOCUS                                            | Ellis K, Kerr J, Godbole S, Staudenmayer J, Lanckriet G. Hip and Wrist Accelerometer Algorithms for Free-Living Behavior Classification. <i>Med Sci Sports Exerc.</i> 2016 May;48(5):933-40. doi: 10.1249/MSS.0000000000000840. PMID: 26673126; PMCID: PMC4833514.                                                                       |
| 66 | FOCUSED ON POSTURE OR BALANCE OR PLANTAR PRESSURE      | Engelberger RP, Indermühle A, Baumann F, Fahrni J, Diehm N, Kucher N, Egermann U, Laederach K, Baumgartner I, Willenberg T. Diurnal changes of lower leg volume in obese and non-obese subjects. <i>Int J Obes (Lond).</i> 2014 Jun;38(6):801-5. doi: 10.1038/ijo.2013.178. Epub 2013 Sep 13. PMID: 24030515.                            |
| 67 | POPULATION AFFECTED BY PATHOLOGIES OR PAIN             | Fang MA, Heiney C, Yentes JM, Harada ND, Masih S, Perell-Gerson KL. Effects of contralateral versus ipsilateral cane use on gait in people with knee osteoarthritis. <i>PM R.</i> 2015 Apr;7(4):400-6. doi: 10.1016/j.pmrj.2014.09.018. Epub 2014 Oct 8. PMID: 25305371.                                                                 |
| 68 | OTHER FOCUS                                            | Feito Y, Bassett DR, Tyo B, Thompson DL. Effects of body mass index and tilt angle on output of two wearable activity monitors. <i>Med Sci Sports Exerc.</i> 2011 May;43(5):861-6. doi: 10.1249/MSS.0b013e3181fef40. PMID: 20962689.                                                                                                     |
| 69 | POPULATION NOT STRATIFIED OR BMI <30 kg/m <sup>2</sup> | Fischer AG, Wolf A. The effects of body weight unloading on kinetics and muscle activity of overweight males during Overground walking. <i>Clinical Biomechanics</i> , Volume 52, 2018, Pages 80-85, ISSN 0268-0033, <a href="https://doi.org/10.1016/j.clinbiomech.2018.01.013">https://doi.org/10.1016/j.clinbiomech.2018.01.013</a> . |
| 70 | FOCUSED ON POSTURE OR BALANCE OR PLANTAR PRESSURE      | Fourchet F, Maffiuletti NA, Agosti F, Patrizi A, Sartorio A. Impact of rocker sole footwear on plantar pressure distribution during standing and walking in adult obese women. <i>Disabil Rehabil.</i> 2020 Apr;42(7):927-930. doi: 10.1080/09638288.2018.1512012. Epub 2018 Nov 25. PMID: 30474431.                                     |
| 71 | FOCUSED ON POSTURE OR BALANCE OR PLANTAR PRESSURE      | Frames CW, Soangra R, Lockhart TE, Lach J, Ha DS, Roberto KA, Lieberman A. Dynamical Properties of Postural Control in Obese Community-Dwelling Older Adults †. <i>Sensors (Basel).</i> 2018 May 24;18(6):1692. doi: 10.3390/s18061692. PMID: 29794998; PMCID: PMC6021983.                                                               |
| 72 | POPULATION NOT STRATIFIED OR BMI <30 kg/m <sup>2</sup> | Galli M, Cimolin V, Ferrario D, Patti P, Heaney G, Freedland R, Albertini G, Brown WT. Quantitative 3D evaluation of step ascent and descent in individuals with Down syndrome--analysis of a daily challenging task. <i>J Intellect Disabil Res.</i> 2013                                                                               |

|    |                                                           |                                                                                                                                                                                                                                                                                                                                   |
|----|-----------------------------------------------------------|-----------------------------------------------------------------------------------------------------------------------------------------------------------------------------------------------------------------------------------------------------------------------------------------------------------------------------------|
|    |                                                           | Dec;57(12):1143-51. doi: 10.1111/j.1365-2788.2012.01627.x. Epub 2012 Sep 24. PMID: 22998578.                                                                                                                                                                                                                                      |
| 73 | POPULATION NOT STRATIFIED OR<br>BMI <30 kg/m <sup>2</sup> | Gao X, Wang L, Shen F, Ma Y, Fan Y, Niu H. Dynamic walking stability of elderly people with various BMIs. <i>Gait Posture</i> . 2019 Feb;68:168-173. doi: 10.1016/j.gaitpost.2018.11.027. Epub 2018 Nov 20. PMID: 30497036.                                                                                                       |
| 74 | POPULATION NOT STRATIFIED OR<br>BMI <30 kg/m <sup>2</sup> | Glave AP, Olson JM, Applegate DK, Brezzo RD. The effects of two different arm positions and weight status on select kinematic variables during the bodyweight squat. <i>J Strength Cond Res</i> . 2012 Nov;26(11):3148-54. doi: 10.1519/JSC.0b013e318243febf. PMID: 22158095.                                                     |
| 75 | POPULATION NOT STRATIFIED OR<br>BMI <30 kg/m <sup>2</sup> | Golightly YM, Hannan MT, Dufour AB, Hillstrom HJ, Jordan JM. Foot disorders associated with overpronated and oversupinated foot function: the Johnston County osteoarthritis project. <i>Foot Ankle Int</i> . 2014 Nov;35(11):1159-65. doi: 10.1177/1071100714543907. Epub 2014 Jul 18. PMID: 25037712; PMCID: PMC4392721.        |
| 76 | OTHER FOCUS                                               | Gonzalez M, Gates DH, Rosenblatt NJ. The impact of obesity on gait stability in older adults. <i>J Biomech</i> . 2020 Feb 13;100:109585. doi: 10.1016/j.jbiomech.2019.109585. Epub 2019 Dec 17. PMID: 31911052; PMCID: PMC7061260.                                                                                                |
| 77 | POPULATION NOT STRATIFIED OR<br>BMI <30 kg/m <sup>2</sup> | Haggerty M, Dickin DC, Popp J, Wang H. The influence of incline walking on joint mechanics. <i>Gait Posture</i> . 2014 Apr;39(4):1017-21. doi: 10.1016/j.gaitpost.2013.12.027. Epub 2014 Jan 8. PMID: 24472218                                                                                                                    |
| 78 | POPULATION AFFECTED BY<br>PATHOLOGIES OR PAIN             | Hall M, Bennell KL, Beavers DP, Wrigley TV, DeVita P, Messier SP. Does frontal knee kinematics predict treatment outcomes? Exploratory analyses from the Intensive Diet and Exercise for Arthritis (IDEA) trial. <i>Gait Posture</i> . 2018 Jun;63:139-144. doi: 10.1016/j.gaitpost.2018.04.045. Epub 2018 Apr 27. PMID: 29730489 |
| 79 | OTHER FOCUS                                               | Hamilton M, Strawderman L, Hale B, Babski-Reeves K. Effects of BMI and task parameters on postural sway during simulated small parts assembly. <i>Ergonomics</i> . 2015;58(3):504-12. doi: 10.1080/00140139.2014.972468. Epub 2014 Oct 24. PMID: 25343497.                                                                        |
| 80 | PUBLICATION TYPE                                          | Handrigan GA, Corbeil P, Simoneau M, Teasdale N. Balance control is altered in obese individuals. <i>J Biomech</i> . 2010 Jan 19;43(2):383-4; author reply 385-6. doi: 10.1016/j.jbiomech.2009.08.041. Epub 2009 Oct 31. PMID: 19880125.                                                                                          |

|    |                                                        |                                                                                                                                                                                                                                                                                                                                                                                                                   |
|----|--------------------------------------------------------|-------------------------------------------------------------------------------------------------------------------------------------------------------------------------------------------------------------------------------------------------------------------------------------------------------------------------------------------------------------------------------------------------------------------|
| 81 | POPULATION AFFECTED BY PATHOLOGIES OR PAIN             | Harding GT, Hubley-Kozey CL, Dunbar MJ, Stanish WD, Astephen Wilson JL. Body mass index affects knee joint mechanics during gait differently with and without moderate knee osteoarthritis. <i>Osteoarthritis Cartilage</i> . 2012 Nov;20(11):1234-42. doi: 10.1016/j.joca.2012.08.004. Epub 2012 Aug 16. PMID: 22902710.                                                                                         |
| 82 | POPULATION AFFECTED BY PATHOLOGIES OR PAIN             | Harding GT, Dunbar MJ, Hubley-Kozey CL, Stanish WD, Astephen Wilson JL. Obesity is associated with higher absolute tibiofemoral contact and muscle forces during gait with and without knee osteoarthritis. <i>Clin Biomech (Bristol, Avon)</i> . 2016 Jan;31:79-86. doi: 10.1016/j.clinbiomech.2015.09.017. Epub 2015 Sep 30. Erratum in: <i>Clin Biomech (Bristol, Avon)</i> . 2017 Mar;43:121. PMID: 26476602. |
| 83 | POPULATION NOT STRATIFIED OR BMI <30 kg/m <sup>2</sup> | Herssens N, van Criekinge T, Saeys W, Truijen S, Vereeck L, van Rompaey V, Hallemans A. 2020 An investigation of the spatio-temporal parameters of gait and margins of stability throughout adulthood. <i>J. R. Soc. Interface</i> 17: 20200194. <a href="http://dx.doi.org/10.1098/rsif.2020.0194">http://dx.doi.org/10.1098/rsif.2020.0194</a>                                                                  |
| 84 | POPULATION NOT STRATIFIED OR BMI <30 kg/m <sup>2</sup> | Hora M, Sládek V, Soumar L, Stráníková K, Michálek T ."Influence of body mass and lower limb length on knee flexion angle during walking in humans," <i>Folia Zoologica</i> , 61(3–4), 330-339, (1 November 2012)                                                                                                                                                                                                 |
| 85 | POPULATION <18 YEARS                                   | Horsak B, Pobatschnig B, Baca A, Greber-Platzer S, Kreissl A, Nehrer S, Wondrasch B, Crevenna R, Keilani M, Kranzl A. Within-assessor reliability and minimal detectable change of gait kinematics in a young obese demographic. <i>Gait Posture</i> . 2017 May;54:112-118. doi: 10.1016/j.gaitpost.2017.02.028. Epub 2017 Mar 2. PMID: 28288331.                                                                 |
| 86 | POPULATION <18 YEARS                                   | Horsak B, Schwab C, Clemens C, Baca A, Greber-Platzer S, Kreissl A, Kranzl A. Is the reliability of 3D kinematics of young obese participants dependent on the hip joint center localization method used?, <i>Gait &amp; Posture</i> , Volume 59, 2018, Pages 65-70, ISSN 0966-6362, <a href="https://doi.org/10.1016/j.gaitpost.2017.09.029">https://doi.org/10.1016/j.gaitpost.2017.09.029</a> .                |
| 87 | POPULATION <18 YEARS                                   | Horsak B, Schwab C, Baca A, Greber-Platzer S, Kreissl A, Nehrer S, Keilani M, Crevenna R, Kranzl A, Wondrasch B. Effects of a lower extremity exercise program on gait biomechanics and clinical outcomes in children and adolescents with obesity: A randomized controlled trial. <i>Gait Posture</i> . 2019 May;70:122-129. doi: 10.1016/j.gaitpost.2019.02.032. Epub 2019 Feb 27. PMID: 30851623.              |

|    |                                                        |                                                                                                                                                                                                                                                                                                                                                    |
|----|--------------------------------------------------------|----------------------------------------------------------------------------------------------------------------------------------------------------------------------------------------------------------------------------------------------------------------------------------------------------------------------------------------------------|
| 88 | POPULATION >18 YEARS                                   | Horsak B, Schwab C, Durstberger S, Thajer A, Greber-Platzer S, Kainz H, Jonkers I, Kranzl A. 3D free-hand ultrasound to register anatomical landmarks at the pelvis and localize the hip joint center in lean and obese individuals. <i>Sci Rep</i> . 2021 May 20;11(1):10650. doi: 10.1038/s41598-021-89763-7. PMID: 34017023; PMCID: PMC8170673. |
| 89 | POPULATION <18 YEARS                                   | Horsak B, Schwab C, Leboeuf F, Kranzl A. Reliability of walking and stair climbing kinematics in a young obese population using a standard kinematic and the CGM2 model. <i>Gait Posture</i> . 2021 Jan;83:96-99. doi: 10.1016/j.gaitpost.2020.10.017. Epub 2020 Oct 16. PMID: 33129173.                                                           |
| 90 | SURGICAL INTERVENTION                                  | Hortobágyi T, Herring C, Pories WJ, Rider P, Devita P. Massive weight loss-induced mechanical plasticity in obese gait. <i>J Appl Physiol</i> (1985). 2011 Nov;111(5):1391-9. doi: 10.1152/japplphysiol.00291.2011. Epub 2011 Aug 18. PMID: 21852410; PMCID: PMC3220312.                                                                           |
| 91 | POPULATION NOT STRATIFIED OR BMI <30 kg/m <sup>2</sup> | Huffman KD, Sanford BA, Zucker-Levin AR, Williams JL, Mihalko WM. Increased hip abduction in high body mass index subjects during sit-to-stand. <i>Gait Posture</i> . 2015 Feb;41(2):640-5. doi: 10.1016/j.gaitpost.2015.01.014. Epub 2015 Jan 21. PMID: 25655834.                                                                                 |
| 92 | POPULATION <18 YEARS                                   | Hung YC, Mangiafreno M, Gill SV. Whole body organization during a symmetric bimanual pick up task in overweight and obese children. <i>Gait Posture</i> . 2017 Feb;52:95-99. doi: 10.1016/j.gaitpost.2016.11.030. Epub 2016 Nov 19. PMID: 27888697.                                                                                                |
| 93 | OTHER FOCUS                                            | Jalai CM, Diebo BG, Cruz DL, Poorman GW, Vira S, Buckland AJ, Lafage R, Bess S, Errico TJ, Lafage V, Passias PG. The impact of obesity on compensatory mechanisms in response to progressive sagittal malalignment. <i>Spine J</i> . 2017 May;17(5):681-688. doi: 10.1016/j.spinee.2016.11.016. Epub 2016 Dec 1. PMID: 27916684.                   |
| 94 | POPULATION NOT STRATIFIED OR BMI <30 kg/m <sup>2</sup> | Jeong H, Johnson AW, Feland JB, Petersen SR, Staten JM, Bruening DA (2021) Added body mass alters plantar shear stresses, postural control, and gait kinetics: Implications for obesity. <i>PLoS ONE</i> 16(2): e0246605. <a href="https://doi.org/10.1371/journal.pone.0246605">https://doi.org/10.1371/journal.pone.0246605</a>                  |
| 95 | POPULATION NOT STRATIFIED OR BMI <30 kg/m <sup>2</sup> | Kathirgamanathan B, Silva P, Fernandez J (2019) Implication of obesity on motion, posture and internal stress of the foot: an experimental and finite element analysis, <i>Computer Methods in Biomechanics and Biomedical Engineering</i> , 22:1, 47-54, DOI: 10.1080/10255842.2018.1527320                                                       |

|     |                                                        |                                                                                                                                                                                                                                                                                                                                                                        |
|-----|--------------------------------------------------------|------------------------------------------------------------------------------------------------------------------------------------------------------------------------------------------------------------------------------------------------------------------------------------------------------------------------------------------------------------------------|
| 96  | POPULATION AFFECTED BY PATHOLOGIES OR PAIN             | Kean CO, Bennell KL, Wrigley TV, Hinman RS. Modified walking shoes for knee osteoarthritis: Mechanisms for reductions in the knee adduction moment. J Biomech. 2013 Aug 9;46(12):2060-6. doi: 10.1016/j.jbiomech.2013.05.011. Epub 2013 Jun 14. PMID: 23768609.                                                                                                        |
| 97  | POPULATION NOT STRATIFIED OR BMI <30 kg/m <sup>2</sup> | Kim HK, Dai X, Lu SH, Lu TW, Chou LS. Discriminating features of ground reaction forces in overweight old and young adults during walking using functional principal component analysis, Gait & Posture, Volume 94, 2022, Pages 166-172, ISSN 0966-6362, <a href="https://doi.org/10.1016/j.gaitpost.2022.03.012">https://doi.org/10.1016/j.gaitpost.2022.03.012</a> . |
| 98  | POPULATION AFFECTED BY PATHOLOGIES OR PAIN             | Knarr BA, Higginson JS, Zeni JA. Change in knee contact force with simulated change in body weight. Comput Methods Biomech Biomed Engin. 2016 Feb;19(3):320-323. doi: 10.1080/10255842.2015.1018193. Epub 2015 Mar 11. PMID: 25760517; PMCID: PMC4567548.                                                                                                              |
| 99  | POPULATION AFFECTED BY PATHOLOGIES OR PAIN             | Ko S, Stenholm S, Ferrucci L. Characteristic gait patterns in older adults with obesity--results from the Baltimore Longitudinal Study of Aging. J Biomech. 2010 Apr 19;43(6):1104-10. doi: 10.1016/j.jbiomech.2009.12.004. Epub 2010 Jan 18. PMID: 20080238; PMCID: PMC2849896.                                                                                       |
| 100 | FOCUSED ON POSTURE OR BALANCE OR PLANTAR PRESSURE      | Ku PX, Abu Osman NA, Yusof A, Wan Abas WA. Biomechanical evaluation of the relationship between postural control and body mass index. J Biomech. 2012 Jun 1;45(9):1638-42. doi: 10.1016/j.jbiomech.2012.03.029. Epub 2012 Apr 14. PMID: 22507349.                                                                                                                      |
| 101 | INSTRUMENTATION NOT SPECIFIED                          | Lathrop-Lambach RL, Asay JL, Jamison ST, Pan X, Schmitt LC, Blazek K, Siston RA, Andriacchi TP, Chaudhari AM. Evidence for joint moment asymmetry in healthy populations during gait. Gait Posture. 2014 Sep;40(4):526-31. doi: 10.1016/j.gaitpost.2014.06.010. Epub 2014 Jul 1. PMID: 25035185; PMCID: PMC4267535.                                                    |
| 102 | POPULATION NOT STRATIFIED OR BMI <30 kg/m <sup>2</sup> | Lee Y, Shin S. The Effect of Body Composition on Gait Variability Varies with Age: Interaction by Hierarchical Moderated Regression Analysis. Int J Environ Res Public Health. 2022 Jan 21;19(3):1171. doi: 10.3390/ijerph19031171. PMID: 35162200; PMCID: PMC8834456.                                                                                                 |
| 103 | SURGICAL INTERVENTION                                  | Legrand T, Richard V, Bonnefoy-Mazure A, Armand S, Miozzari HH, Turcot K. The impact of body-mass index on the frontal knee alignment estimation using three-                                                                                                                                                                                                          |

|     |                                                        |                                                                                                                                                                                                                                                                                                                                                                                                                                                                                                                       |
|-----|--------------------------------------------------------|-----------------------------------------------------------------------------------------------------------------------------------------------------------------------------------------------------------------------------------------------------------------------------------------------------------------------------------------------------------------------------------------------------------------------------------------------------------------------------------------------------------------------|
|     |                                                        | dimensional reconstruction based on movement analysis. Knee. 2020 Jan;27(1):89-94. doi: 10.1016/j.knee.2019.09.020. Epub 2019 Dec 24. PMID: 31870700.                                                                                                                                                                                                                                                                                                                                                                 |
| 104 | POPULATION NOT STRATIFIED OR BMI <30 kg/m <sup>2</sup> | Leirós-Rodríguez, R.; Romo-Pérez, V.; Arce-Fariña, M.E. y García-Soidán, J.L. (2018) Relación entre composición corporal y movimientos realizados durante la marcha en mujeres / Associations between body composition and movements during gait in women. Revista Internacional de Medicina y Ciencias de la Actividad Física y el Deporte vol. 18 (72) pp. 693-707<br><a href="http://cdeporte.rediris.es/revista/revista72/artrelacion970.htm">Http://cdeporte.rediris.es/revista/revista72/artrelacion970.htm</a> |
| 105 | POPULATION <18 YEARS                                   | Lerner ZF, Board WJ, Browning RC. Pediatric obesity and walking duration increase medial tibiofemoral compartment contact forces. J Orthop Res. 2016 Jan;34(1):97-105. doi: 10.1002/jor.23028. Epub 2015 Aug 28. PMID: 26271943.                                                                                                                                                                                                                                                                                      |
| 106 | POPULATION <18 YEARS                                   | Lerner ZF, Browning RC. Compressive and shear hip joint contact forces are affected by pediatric obesity during walking. J Biomech. 2016 Jun 14;49(9):1547-1553. doi: 10.1016/j.jbiomech.2016.03.033. Epub 2016 Mar 25. PMID: 27040390; PMCID: PMC4885751.                                                                                                                                                                                                                                                            |
| 107 | POPULATION NOT STRATIFIED OR BMI <30 kg/m <sup>2</sup> | Lerner ZF, Haight DJ, DeMers MS, Board WJ, Browning RC. The effects of walking speed on tibiofemoral loading estimated via musculoskeletal modeling. J Appl Biomech. 2014 Apr;30(2):197-205. doi: 10.1123/jab.2012-0206. Epub 2013 Jul 22. PMID: 23878264; PMCID: PMC4423394.                                                                                                                                                                                                                                         |
| 108 | POPULATION AFFECTED BY PATHOLOGIES OR PAIN             | Li JS, Tsai TY, Felson DT, Li G, Lewis CL. Six degree-of-freedom knee joint kinematics in obese individuals with knee pain during gait. PLoS One. 2017 Mar 24;12(3):e0174663. doi: 10.1371/journal.pone.0174663. Erratum in: PLoS One. 2019 Feb 22;14(2):e0213084. PMID: 28339477; PMCID: PMC5365132.                                                                                                                                                                                                                 |
| 109 | POPULATION AFFECTED BY PATHOLOGIES OR PAIN             | Li JS, Tsai TY, Clancy MM, Li G, Lewis CL, Felson DT. Weight loss changed gait kinematics in individuals with obesity and knee pain. Gait Posture. 2019 Feb;68:461-465. doi: 10.1016/j.gaitpost.2018.12.031. Epub 2018 Dec 24. PMID: 30611976; PMCID: PMC6599530.                                                                                                                                                                                                                                                     |
| 110 | POPULATION AFFECTED BY PATHOLOGIES OR PAIN             | Li JS, Tsai TY, Clancy MM, Lewis CL, Felson DT, Li G. Cartilage contact characteristics of the knee during gait in individuals with obesity. J Orthop Res. 2022 Nov;40(11):2480-2487. doi: 10.1002/jor.25288. Epub 2022 Feb 4. PMID: 35076128; PMCID: PMC9309196.                                                                                                                                                                                                                                                     |

|     |                                                   |                                                                                                                                                                                                                                                                                                                                                                                                                        |
|-----|---------------------------------------------------|------------------------------------------------------------------------------------------------------------------------------------------------------------------------------------------------------------------------------------------------------------------------------------------------------------------------------------------------------------------------------------------------------------------------|
| 111 | POPULATION <18 YEARS                              | Long JT, Neogi S, Caldwell CM, DeLange MP. Variation inflation factor-based regression modeling of anthropometric measures and temporal-spatial performance: Modeling approach and implications for clinical utility. <i>Clinical Biomechanics</i> , Volume 51, 2018, Pages 51-57, ISSN 0268-0033, <a href="https://doi.org/10.1016/j.clinbiomech.2017.11.008">https://doi.org/10.1016/j.clinbiomech.2017.11.008</a> . |
| 112 | SURGICAL INTERVENTION                             | Lugade V, Wu A, Jewett B, Collis D, Chou LS. Gait asymmetry following an anterior and anterolateral approach to total hip arthroplasty. <i>Clin Biomech (Bristol, Avon)</i> . 2010 Aug;25(7):675-80. doi: 10.1016/j.clinbiomech.2010.05.003. Epub 2010 Jun 9. PMID: 20542608.                                                                                                                                          |
| 113 | FOCUSED ON POSTURE OR BALANCE OR PLANTAR PRESSURE | Maffiuletti NA, Visscher R, De Col A, Sartorio A. Differences in soleus H-reflex to M-wave ratio between obese and non-obese individuals. <i>Clin Biomech (Bristol, Avon)</i> . 2021 Apr;84:105322. doi: 10.1016/j.clinbiomech.2021.105322. Epub 2021 Mar 11. PMID: 33756402.                                                                                                                                          |
| 114 | POPULATION <18 YEARS                              | Mahaffey R, Morrison SC, Bassett P, Drechsler WI, Cramp MC. Biomechanical characteristics of lower limb gait waveforms: Associations with body fat in children. <i>Gait Posture</i> . 2018 Mar;61:220-225. doi: 10.1016/j.gaitpost.2018.01.019. Epub 2018 Mar 20. PMID: 29413788.                                                                                                                                      |
| 115 | POPULATION <18 YEARS                              | Mahaffey R, Morrison SC, Bassett P, Drechsler WI, Cramp MC. The impact of body fat on three dimensional motion of the paediatric foot during walking. <i>Gait Posture</i> . 2016 Feb;44:155-60. doi: 10.1016/j.gaitpost.2015.12.009. Epub 2015 Dec 14. PMID: 27004650.                                                                                                                                                 |
| 116 | FOCUSED ON POSTURE OR BALANCE OR PLANTAR PRESSURE | Maktouf W, Guilherme C, Boyas S, Beaune B, Durand S. Relationships between lower limbs fatigability threshold and postural control in obese adults. <i>J Biomech</i> . 2020 May 22;105:109819. doi: 10.1016/j.jbiomech.2020.109819. Epub 2020 Apr 25. PMID: 32423537.                                                                                                                                                  |
| 117 | POPULATION AFFECTED BY PATHOLOGIES OR PAIN        | Malatesta D, Vismara L, Menegoni F, Grugni G, Capodaglio P. Effect of obesity onset on pendular energy transduction at spontaneous walking speed: Prader-Willi versus nonsyndromal obese individuals. <i>Obesity (Silver Spring)</i> . 2013 Dec;21(12):E586-91. doi: 10.1002/oby.20455. Epub 2013 Jun 13. PMID: 23554340.                                                                                              |
| 118 | SURGICAL INTERVENTION                             | Martz P, Bourredjem A, Maillefert JF, Binquet C, Baulot E, Ornetti P, Laroche D. Influence of body mass index on sagittal hip range of motion and gait speed                                                                                                                                                                                                                                                           |

|     |                                                        |                                                                                                                                                                                                                                                                                                                                                                                                                                                                             |
|-----|--------------------------------------------------------|-----------------------------------------------------------------------------------------------------------------------------------------------------------------------------------------------------------------------------------------------------------------------------------------------------------------------------------------------------------------------------------------------------------------------------------------------------------------------------|
|     |                                                        | recovery six months after total hip arthroplasty. <i>Int Orthop.</i> 2019 Nov;43(11):2447-2455. doi: 10.1007/s00264-018-4250-y. Epub 2019 Jan 5. PMID: 30612173.                                                                                                                                                                                                                                                                                                            |
| 119 | FOCUSED ON POSTURE OR BALANCE OR PLANTAR PRESSURE      | Matrangola SL, Madigan ML. The effects of obesity on balance recovery using an ankle strategy. <i>Hum Mov Sci.</i> 2011 Jun;30(3):584-95. doi: 10.1016/j.humov.2010.11.007. Epub 2011 Apr 5. PMID: 21470705.                                                                                                                                                                                                                                                                |
| 120 | POPULATION NOT STRATIFIED OR BMI <30 kg/m <sup>2</sup> | Matuszewska A, Syczewska M. Analysis of the movements of the upper extremities during gait: Their role for the dynamic balance. <i>Gait Posture.</i> 2022 Dec 6;100:82-90. doi: 10.1016/j.gaitpost.2022.12.004. Epub ahead of print. PMID: 36502665.                                                                                                                                                                                                                        |
| 121 | POPULATION <18 YEARS                                   | McMillan AG, Pulver AM, Collier DN, Williams DS. Sagittal and frontal plane joint mechanics throughout the stance phase of walking in adolescents who are obese. <i>Gait Posture.</i> 2010 Jun;32(2):263-8. doi: 10.1016/j.gaitpost.2010.05.008. Epub 2010 Jun 22. PMID: 20573511.                                                                                                                                                                                          |
| 122 | POPULATION <18 YEARS                                   | McMillan AG, Phillips KA, Collier DN, Blaise Williams DS. Frontal and sagittal plane biomechanics during drop jump landing in boys who are obese. <i>Pediatr Phys Ther.</i> 2010 Spring;22(1):34-41. doi: 10.1097/PEP.0b013e3181cd1868. PMID: 20142703                                                                                                                                                                                                                      |
| 123 | OTHER FOCUS                                            | Meng H, Gorniak SL. Effects of adiposity on postural control and cognition in older adults. <i>Gait Posture.</i> 2020 Oct;82:147-152. doi: 10.1016/j.gaitpost.2020.09.004. Epub 2020 Sep 6. PMID: 32927221.                                                                                                                                                                                                                                                                 |
| 124 | POPULATION NOT STRATIFIED OR BMI <30 kg/m <sup>2</sup> | Merlo A, Campanini I. Impact of instrumental analysis of stiff knee gait on treatment appropriateness and associated costs in stroke patients. <i>Gait Posture.</i> 2019 Jul;72:195-201. doi: 10.1016/j.gaitpost.2019.06.009. Epub 2019 Jun 13. PMID: 31228856.                                                                                                                                                                                                             |
| 125 | POPULATION NOT STRATIFIED OR BMI <30 kg/m <sup>2</sup> | Messier SP, Legault C, Loeser RF, Van Arsdale SJ, Davis C, Ettinger WH, DeVita P. Does high weight loss in older adults with knee osteoarthritis affect bone-on-bone joint loads and muscle forces during walking? <i>Osteoarthritis Cartilage.</i> 2011 Mar;19(3):272-80. doi: 10.1016/j.joca.2010.11.010. Epub 2010 Dec 4. PMID: 21134477; PMCID: PMC3444807.                                                                                                             |
| 126 | POPULATION AFFECTED BY PATHOLOGIES OR PAIN             | Messier SP, Mihalko SL, Legault C, Miller GD, Nicklas BJ, DeVita P, Beavers DP, Hunter DJ, Lyles MF, Eckstein F, Williamson JD, Carr JJ, Guermazi A, Loeser RF. Effects of intensive diet and exercise on knee joint loads, inflammation, and clinical outcomes among overweight and obese adults with knee osteoarthritis: the IDEA randomized clinical trial. <i>JAMA.</i> 2013 Sep 25;310(12):1263-73. doi: 10.1001/jama.2013.277669. PMID: 24065013; PMCID: PMC4450354. |



|     |                                                   |                                                                                                                                                                                                                                                                                                                                                                                                     |
|-----|---------------------------------------------------|-----------------------------------------------------------------------------------------------------------------------------------------------------------------------------------------------------------------------------------------------------------------------------------------------------------------------------------------------------------------------------------------------------|
| 127 | POPULATION AFFECTED BY PATHOLOGIES OR PAIN        | Messier SP, Pater M, Beavers DP, Legault C, Loeser RF, Hunter DJ, DeVita P. Influences of alignment and obesity on knee joint loading in osteoarthritic gait. Osteoarthritis Cartilage. 2014 Jul;22(7):912-7. doi: 10.1016/j.joca.2014.05.013. Epub 2014 May 21. PMID: 24857973; PMCID: PMC4108726.                                                                                                 |
| 128 | FOCUSED ON POSTURE OR BALANCE OR PLANTAR PRESSURE | Miller EM , Matrangola SL, Madigan ML. (2011) Effects of obesity on balance recovery from small postural perturbations, Ergonomics, 54:6, 547-554, DOI: 10.1080/00140139.2011.582959                                                                                                                                                                                                                |
| 129 | POPULATION <18 YEARS                              | Molina-Garcia P, Plaza-Florido A, Mora-Gonzalez J, Torres-Lopez LV, Vanrenterghem J, Ortega FB. Role of physical fitness and functional movement in the body posture of children with overweight/obesity. Gait Posture. 2020 Jul;80:331-338. doi: 10.1016/j.gaitpost.2020.04.001. Epub 2020 Apr 11. PMID: 32599548.                                                                                 |
| 130 | POPULATION <18 YEARS                              | Molina-Garcia P, Molina-Molina A, Smeets A, Migueles JH, Ortega FB, Vanrenterghem J. Effects of integrative neuromuscular training on the gait biomechanics of children with overweight and obesity. Scand J Med Sci Sports. 2022 Jul;32(7):1119-1130. doi: 10.1111/sms.14163. Epub 2022 Apr 29. PMID: 35398912; PMCID: PMC9540886                                                                  |
| 131 | POPULATION <18 YEARS                              | Molina-Garcia P, Miranda-Aparicio D, Molina-Molina A, Plaza-Florido A, Migueles JH, Mora-Gonzalez J, Cadenas-Sanchez C, Esteban-Cornejo I, Rodriguez-Ayllon M, Solis-Urra P, Vanrenterghem J, Ortega FB. Effects of Exercise on Plantar Pressure during Walking in Children with Overweight/Obesity. Med Sci Sports Exerc. 2020 Mar;52(3):654-662. doi: 10.1249/MSS.0000000000002157. PMID: 3152482 |
| 132 | POPULATION <18 YEARS                              | Monte A. Insight into the biomechanics and bioenergetics of human walking: Obese versus healthy children. Exp Physiol. 2020 Jul;105(7):1058-1059. doi: 10.1113/EP088772. Epub 2020 Jun 3. PMID: 32441828.                                                                                                                                                                                           |
| 133 | OTHER FOCUS                                       | Monteiro M, Gabriel R, Aranha J, Neves e Castro M, Sousa M, Moreira M. Influence of obesity and sarcopenic obesity on plantar pressure of postmenopausal women. Clin Biomech (Bristol, Avon). 2010 Jun;25(5):461-7. doi: 10.1016/j.clinbiomech.2010.01.017. Epub 2010 Feb 21. PMID: 20176421.                                                                                                       |
| 134 | POPULATION <18 YEARS                              | Montes-Alguacil J, Páez-Moguer J, Jiménez Cebrián AM, Muñoz BÁ, Gijón-Noguerón G, Morales-Asencio JM. The influence of childhood obesity on spatio-temporal gait parameters. Gait Posture. 2019 Jun;71:69-73. doi: 10.1016/j.gaitpost.2019.03.031. Epub 2019 Mar 30. PMID: 31009919.                                                                                                                |

|     |                                                           |                                                                                                                                                                                                                                                                                                        |
|-----|-----------------------------------------------------------|--------------------------------------------------------------------------------------------------------------------------------------------------------------------------------------------------------------------------------------------------------------------------------------------------------|
| 135 | POPULATION NOT STRATIFIED OR<br>BMI <30 kg/m <sup>2</sup> | Mullerpatan RP, Agarwal BM, Shetty T, Nehete GR, Narasipura OS. Kinematics of Suryanamaskar Using Three-Dimensional Motion Capture. <i>Int J Yoga</i> . 2019 May-Aug;12(2):124-131. doi: 10.4103/ijoy.IJOY_26_18. PMID: 31143020; PMCID: PMC6521759.                                                   |
| 136 | FOCUSED ON POSTURE OR BALANCE<br>OR PLANTAR PRESSURE      | Naderi A, Baloochi R, Rostami KD, Fourchet F, Degens H. Obesity and foot muscle strength are associated with high dynamic plantar pressure during running. <i>Foot (Edinb)</i> . 2020 Sep;44:101683. doi: 10.1016/j.foot.2020.101683. Epub 2020 Apr 3. PMID: 32801069.                                 |
| 137 | PUBLICATION TYPE                                          | Hyejeong Nam, Jin-Hyun Kim and Jee-In Kim, "Smart Belt : A wearable device for managing abdominal obesity," <i>2016 International Conference on Big Data and Smart Computing (BigComp)</i> , Hong Kong, 2016, pp. 430-434, doi: 10.1109/BIGCOMP.2016.7425964.                                          |
| 138 | POPULATION NOT STRATIFIED OR<br>BMI <30 kg/m <sup>2</sup> | O'Brien DL, Tyndyk M. Effect of arch type and Body Mass Index on plantar pressure distribution during stance phase of gait. <i>Acta Bioeng Biomech</i> . 2014;16(2):131-5. PMID: 25088082.                                                                                                             |
| 139 | POPULATION >18 YEARS                                      | Orantes-Gonzalez E, Heredia-Jimenez J. Does schoolbag carriage equally affect obese/overweight and healthy-weight children? <i>Appl Ergon</i> . 2021 Jan;90:103236. doi: 10.1016/j.apergo.2020.103236. Epub 2020 Aug 24. PMID: 32854066.                                                               |
| 140 | POPULATION NOT STRATIFIED OR<br>BMI <30 kg/m <sup>2</sup> | Pamukoff DN, Holmes SC, Garcia SA, Vakula MN, Shumski EJ, Moffit TJ. Influence of body mass index and anterior cruciate ligament reconstruction on gait biomechanics. <i>J Orthop Res</i> . 2022 Oct 7. doi: 10.1002/jor.25451. Epub ahead of print. PMID: 36205181.                                   |
| 141 | FOCUSED ON POSTURE OR BALANCE<br>OR PLANTAR PRESSURE      | Pamukoff DN, Dudley RI, Vakula MN, Blackburn JT. An evaluation of the heel strike transient in obese young adults during walking gait. <i>Gait Posture</i> . 2016 Sep;49:181-183. doi: 10.1016/j.gaitpost.2016.07.001. Epub 2016 Jul 1. PMID: 27434487.                                                |
| 142 | POPULATION <18 YEAR                                       | Pande A, Mohapatra P, Nicorici A, Han JJ. Machine Learning to Improve Energy Expenditure Estimation in Children With Disabilities: A Pilot Study in Duchenne Muscular Dystrophy. <i>JMIR Rehabil Assist Technol</i> . 2016 Jul 19;3(2):e7. doi: 10.2196/rehab.4340. PMID: 28582264; PMCID: PMC5454548. |
| 143 | POPULATION AFFECTED BY<br>PATHOLOGIES OR PAIN             | Paterson KL, Sosdian L, Hinman RS, Wrigley TV, Kasza J, Dowsey M, Choong P, Bennell KL. Effects of sex and obesity on gait biomechanics before and six months after total knee arthroplasty: A longitudinal cohort study. <i>Gait Posture</i> . 2018                                                   |

|     |                                                        |                                                                                                                                                                                                                                                                                                                                                           |
|-----|--------------------------------------------------------|-----------------------------------------------------------------------------------------------------------------------------------------------------------------------------------------------------------------------------------------------------------------------------------------------------------------------------------------------------------|
|     |                                                        | Mar;61:263-268. doi: 10.1016/j.gaitpost.2018.01.014. Epub 2018 Mar 20. PMID: 29413795.                                                                                                                                                                                                                                                                    |
| 144 | POPULATION AFFECTED BY PATHOLOGIES OR PAIN             | Paterson KL, Sosdian L, Hinman RS, Wrigley TV, Kasza J, Dowsey M, Choong P, Bennell KL. The influence of sex and obesity on gait biomechanics in people with severe knee osteoarthritis scheduled for arthroplasty. Clin Biomech (Bristol, Avon). 2017 Nov;49:72-77. doi: 10.1016/j.clinbiomech.2017.08.013. Epub 2017 Sep 5. PMID: 28892670.             |
| 145 | FOCUSED ON POSTURE OR BALANCE OR PLANTAR PRESSURE      | Peduzzi de Castro M, Abreu S, Pinto V, Santos R, Machado L, Vaz M, Vilas-Boas JP. Influence of pressure-relief insoles developed for loaded gait (backpackers and obese people) on plantar pressure distribution and ground reaction forces. Appl Ergon. 2014 Jul;45(4):1028-34. doi: 10.1016/j.apergo.2014.01.005. Epub 2014 Jan 24. PMID: 24468683.     |
| 146 | POPULATION <18 YEARS                                   | Peyrot N, Morin JB, Thivel D, Isacco L, Taillardat M, Belli A, Duche P. Mechanical work and metabolic cost of walking after weight loss in obese adolescents. Med Sci Sports Exerc. 2010 Oct;42(10):1914-22. doi: 10.1249/MSS.0b013e3181da8d1e. PMID: 20216466.                                                                                           |
| 147 | OTHER FOCUS                                            | Pryce R, Kriellaars D. Body segment inertial parameters and low back load in individuals with central adiposity. J Biomech. 2014 Sep 22;47(12):3080-6. doi: 10.1016/j.jbiomech.2014.06.038. Epub 2014 Jul 5. PMID: 25047741.                                                                                                                              |
| 148 | POPULATION NOT STRATIFIED OR BMI <30 kg/m <sup>2</sup> | Ransom AL, Walaszek MC, Shapiro R, Bollinger LM. External loading alters lower extremity kinetics, kinematics, and muscle activity in a distribution-specific manner during the transition from stair descent to level walking. Clin Biomech (Bristol, Avon). 2019 Oct;69:71-78. doi: 10.1016/j.clinbiomech.2019.07.008. Epub 2019 Jul 5. PMID: 31302492. |
| 149 | POPULATION AFFECTED BY PATHOLOGIES OR PAIN             | Robbins SM, Birmingham TB, Maly MR, Chesworth BM, Giffin JR. Comparative diagnostic accuracy of knee adduction moments in knee osteoarthritis: a case for not normalizing to body size. J Biomech. 2011 Mar 15;44(5):968-71. doi: 10.1016/j.jbiomech.2010.12.021. PMID: 21296354.                                                                         |
| 150 | POPULATION NOT STRATIFIED OR BMI <30 kg/m <sup>2</sup> | Garman CR, Franck CT, Nussbaum MA, Madigan ML. A bootstrapping method to assess the influence of age, obesity, gender, and gait speed on probability of tripping as a function of obstacle height. J Biomech. 2015 Apr 13;48(6):1229-32. doi: 10.1016/j.jbiomech.2015.01.031. Epub 2015 Feb 3. PMID: 25683521.                                            |

|     |                                                        |                                                                                                                                                                                                                                                                                                                                                                                   |
|-----|--------------------------------------------------------|-----------------------------------------------------------------------------------------------------------------------------------------------------------------------------------------------------------------------------------------------------------------------------------------------------------------------------------------------------------------------------------|
| 151 | POPULATION AFFECTED BY PATHOLOGIES OR PAIN             | Russell EM, Hamill J. Lateral wedges decrease biomechanical risk factors for knee osteoarthritis in obese women. <i>J Biomech.</i> 2011 Aug 11;44(12):2286-91. doi: 10.1016/j.jbiomech.2011.05.033. Epub 2011 Jun 29. PMID: 21719018.                                                                                                                                             |
| 152 | POPULATION NOT STRATIFIED OR BMI <30 kg/m <sup>2</sup> | Sazonov ES, Fulk G, Hill J, Schutz Y and Browning R. "Monitoring of Posture Allocations and Activities by a Shoe-Based Wearable Sensor," in <i>IEEE Transactions on Biomedical Engineering</i> , vol. 58, no. 4, pp. 983-990, April 2011, doi: 10.1109/TBME.2010.2046738                                                                                                          |
| 153 | OTHER FOCUS                                            | Schmid S, Armand S, Pataky Z, Golay A, Allet L. The relationship between different body mass index categories and chair rise performance in adult women. <i>J Appl Biomech.</i> 2013 Dec;29(6):705-11. doi: 10.1123/jab.29.6.705. Epub 2013 Feb 19. PMID: 23434794.                                                                                                               |
| 154 | NO ENGLISH                                             | SCHUTZ, G.R.; DETANICO, D.; GOULART JR., R. y DOS SANTOS, S.G.. Análisis de la biomecánica de la marcha en mujeres con hipertrofia mamaria. <i>Cir. plást. ibero-latinoam.</i> [online]. 2013, vol.39, n.4 [citado 2023-02-21], pp.369-380. ISSN 1989-2055. <a href="https://dx.doi.org/10.4321/S0376-78922013000400007">https://dx.doi.org/10.4321/S0376-78922013000400007</a> . |
| 155 | POPULATION NOT STRATIFIED OR BMI <30 kg/m <sup>2</sup> | Sheehan KJ, Gormley J. The influence of excess body mass on adult gait. <i>Clin Biomech (Bristol, Avon).</i> 2013 Mar;28(3):337-43. doi: 10.1016/j.clinbiomech.2013.01.007. Epub 2013 Feb 4. PMID: 23380662.                                                                                                                                                                      |
| 156 | POPULATION <18 YEARS                                   | Shultz SP, Hills AP, Sitler MR, Hillstrom HJ. Body size and walking cadence affect lower extremity joint power in children's gait. <i>Gait Posture.</i> 2010 Jun;32(2):248-52. doi: 10.1016/j.gaitpost.2010.05.001. Epub 2010 May 31. PMID: 20570152.                                                                                                                             |
| 157 | POPULATION <18 YEARS                                   | Shultz SP, D'Hondt E, Lenoir M, Fink PW, Hills AP. The role of excess mass in the adaptation of children's gait. <i>Hum Mov Sci.</i> 2014 Aug;36:12-9. doi: 10.1016/j.humov.2014.05.002. Epub 2014 Jun 6. PMID: 24908185.                                                                                                                                                         |
| 158 | POPULATION <18 YEARS                                   | Shultz SP, D'Hondt E, Fink PW, Lenoir M, Hills AP. The effects of pediatric obesity on dynamic joint malalignment during gait. <i>Clin Biomech (Bristol, Avon).</i> 2014 Aug;29(7):835-8. doi: 10.1016/j.clinbiomech.2014.05.004. Epub 2014 May 21. PMID: 24889987.                                                                                                               |
| 159 | POPULATION NOT STRATIFIED OR BMI <30 kg/m <sup>2</sup> | Sikandar T, Rabbi MF, Ghazali KH, Altwijri O, Almijalli M, Ahamed NU. Evaluating the difference in walk patterns among normal-weight and overweight/obese individuals in real-world surfaces using statistical analysis and deep learning methods with inertial measurement unit data. <i>Phys Eng Sci Med.</i> 2022                                                              |

|     |                                                      |                                                                                                                                                                                                                                                                                                                       |
|-----|------------------------------------------------------|-----------------------------------------------------------------------------------------------------------------------------------------------------------------------------------------------------------------------------------------------------------------------------------------------------------------------|
|     |                                                      | Dec;45(4):1289-1300. doi: 10.1007/s13246-022-01195-3. Epub 2022 Nov 9. PMID: 36352317                                                                                                                                                                                                                                 |
| 160 | FOCUSED ON POSTURE OR BALANCE<br>OR PLANTAR PRESSURE | Silva D, Gabriel R, Moreira M, Abrantes J, Faria A (2016) Foot Rollover Temporal Parameters During Straight-Ahead and Side-Cut Walking in Obese and Nonobese Postmenopausal Women, <i>Journal of Motor Behavior</i> , 48:5, 413-423, DOI:10.1080/00222895.2015.1123139                                                |
| 161 | POPULATION <18 YEARS                                 | Singh B, Negatu MG, Francis SL, Janz KF, Yack HJ. Do fitness and fatigue affect gait biomechanics in overweight and obese children? <i>Gait Posture</i> . 2016 Oct;50:190-195. doi: 10.1016/j.gaitpost.2016.09.006. Epub 2016 Sep 8. PMID: 27637091.                                                                  |
| 162 | OTHER FOCUS                                          | Singh B, Brown TD, Callaghan JJ, Yack HJ. Abdomen-thigh contact during forward reaching tasks in obese individuals. <i>J Appl Biomech</i> . 2013 Oct;29(5):517-24. doi: 10.1123/jab.29.5.517. Epub 2012 Nov 21. PMID: 23183157.                                                                                       |
| 163 | POPULATION <18 YEARS                                 | Song Q, Yu B, Zhang C, Sun W, Mao D. (2014) Effects of Backpack Weight on Posture, Gait Patterns and Ground Reaction Forces of Male Children with Obesity during Stair Descent, <i>Research in Sports Medicine</i> , 22:2, 172-184, DOI: 10.1080/15438627.2014.881823                                                 |
| 164 | FOCUSED ON POSTURE OR BALANCE<br>OR PLANTAR PRESSURE | Song J, Kane R, Tango DN, Veur SS, Furmato J, Komaroff E, Foster GD. Effects of weight loss on foot structure and function in obese adults: a pilot randomized controlled trial. <i>Gait Posture</i> . 2015 Jan;41(1):86-92. doi: 10.1016/j.gaitpost.2014.08.013. Epub 2014 Sep 6. PMID: 25245307; PMCID: PMC4297201. |
| 165 | POPULATION <18 YEARS                                 | Yan SH, Zhang K, Tan GQ, Yang J, Liu ZC. Effects of obesity on dynamic plantar pressure distribution in Chinese prepubescent children during walking. <i>Gait Posture</i> . 2013 Jan;37(1):37-42. doi: 10.1016/j.gaitpost.2012.05.018. Epub 2012 Jul 31. PMID: 22858245.                                              |
| 166 | POPULATION <18 YEARS                                 | Song-Hua Y, Lu W, Kuan Z. Effects of different movement modes on plantar pressure distribution patterns in obese and non-obese Chinese children. <i>Gait Posture</i> . 2017 Sep;57:28-34. doi: 10.1016/j.gaitpost.2017.05.001. Epub 2017 May 4. PMID: 28551468                                                        |
| 167 | POPULATION <18 YEARS                                 | da Rocha ES, Bratz DT, Gubert LC, de David A, Carpes FP. Obese children experience higher plantar pressure and lower foot sensitivity than non-obese. <i>Clin Biomech (Bristol, Avon)</i> . 2014 Aug;29(7):822-7. doi: 10.1016/j.clinbiomech.2014.05.006. Epub 2014 May 28. PMID: 24913089                            |

|     |                                                        |                                                                                                                                                                                                                                                                                                                                                                                        |
|-----|--------------------------------------------------------|----------------------------------------------------------------------------------------------------------------------------------------------------------------------------------------------------------------------------------------------------------------------------------------------------------------------------------------------------------------------------------------|
| 168 | POPULATION <18 YEARS                                   | Steinberg N, Rubinstein M, Nemet D, Ayalon M, Zeev A, Pantanowitz M, Brosh T, Eliakim A. Effects of a Program for Improving Biomechanical Characteristics During Walking and Running in Children Who Are Obese. <i>Pediatr Phys Ther.</i> 2017 Oct;29(4):330-340. doi: 10.1097/PEP.0000000000000440. PMID: 28953178.                                                                   |
| 169 | POPULATION AFFECTED BY PATHOLOGIES OR PAIN             | Stewart S, Morpeth T, Dalbeth N, Vandal AC, Carroll M, Davidtz L, Mawston G, Otter S, Rome K. Foot-related pain and disability and spatiotemporal parameters of gait during self-selected and fast walking speeds in people with gout: A two-arm cross sectional study. <i>Gait Posture.</i> 2016 Feb;44:18-22. doi: 10.1016/j.gaitpost.2015.11.004. Epub 2015 Nov 12. PMID: 27004627. |
| 170 | POPULATION <18 YEARS                                   | Strutzenberger G, Richter A, Schneider M, Mündermann A, Schwameder H. Effects of obesity on the biomechanics of stair-walking in children. <i>Gait Posture.</i> 2011 May;34(1):119-25. doi: 10.1016/j.gaitpost.2011.03.025. Epub 2011 May 4. PMID: 21536442.                                                                                                                           |
| 171 | POPULATION <18 YEARS                                   | Summa S, De Peppo F, Petrarca M, Caccamo R, Carbonetti R, Castelli E, Ottavio Adorisio D. Gait changes after weight loss on adolescent with severe obesity after sleeve gastrectomy. <i>Surg Obes Relat Dis.</i> 2019 Mar;15(3):374-381. doi: 10.1016/j.soard.2019.01.007. Epub 2019 Jan 24. PMID: 30738737.                                                                           |
| 172 | POPULATION AFFECTED BY PATHOLOGIES OR PAIN             | Tassani S, Tio L, Castro-Domínguez F, Monfort J, Monllau JC, González Ballester MA, Noailly J. Relationship Between the Choice of Clinical Treatment, Gait Functionality and Kinetics in Patients With Comparable Knee Osteoarthritis. <i>Front Bioeng Biotechnol.</i> 2022 Mar 11;10:820186. doi: 10.3389/fbioe.2022.820186. PMID: 35360402; PMCID: PMC8962661.                       |
| 173 | PUBLICATION TYPE                                       | David V. Thiel, Hugo G. Espinosa, Glen M. Davis, Elizabeth Dylke, Nasim Foroughi, Sharon L. Kilbreath. Arm Movement: The Effect of Obesity on Active Lifestyles, <i>Procedia Engineering</i> , Volume 60, 2013, Pages 182-187, ISSN 1877-7058, <a href="https://doi.org/10.1016/j.proeng.2013.07.033">https://doi.org/10.1016/j.proeng.2013.07.033</a> .                               |
| 174 | POPULATION NOT STRATIFIED OR BMI <30 kg/m <sup>2</sup> | Urbanek JK, Roth DL, Karas M, Wanigatunga AA, Mitchell CM, Juraschek SP, Cai Y, Appel LJ, Schrack JA. Free-living gait cadence measured by wearable accelerometer: a promising alternative to traditional measures of mobility for assessing fall risk. <i>J Gerontol A Biol Sci Med Sci.</i> 2022 Jan 13;glac013. doi: 10.1093/gerona/glac013. Epub ahead of print. PMID: 35029661.   |

|     |                                                        |                                                                                                                                                                                                                                                                                                                                                                                  |
|-----|--------------------------------------------------------|----------------------------------------------------------------------------------------------------------------------------------------------------------------------------------------------------------------------------------------------------------------------------------------------------------------------------------------------------------------------------------|
| 175 | POPULATION AFFECTED BY PATHOLOGIES OR PAIN             | Vangeneugden J, Verlaan L, Oomen P, Liu WY, Peters M, Natour N, Emans P, Meijer K. Signatures of knee osteoarthritis in women in the temporal and fractal dynamics of human gait. <i>Clin Biomech (Bristol, Avon)</i> . 2020 Jun;76:105016. doi: 10.1016/j.clinbiomech.2020.105016. Epub 2020 Apr 28. PMID: 32438265.                                                            |
| 176 | OTHER FOCUS                                            | Vargas CB, Picolli F, Dani C, Padoin AV, Mottin CC. Functioning of obese individuals in pre- and postoperative periods of bariatric surgery. <i>Obes Surg</i> . 2013 Oct;23(10):1590-5. doi: 10.1007/s11695-013-0924-0. PMID: 23515976.                                                                                                                                          |
| 177 | SURGICAL INTERVENTION                                  | Vartiainen P, Bragge T, Lyytinen T, Hakkarainen M, Karjalainen PA, Arokoski JP. Kinematic and kinetic changes in obese gait in bariatric surgery-induced weight loss, <i>Journal of Biomechanics</i> , Volume 45, Issue 10, 2012, Pages 1769-1774, ISSN 0021-9290, <a href="https://doi.org/10.1016/j.jbiomech.2012.05.002">https://doi.org/10.1016/j.jbiomech.2012.05.002</a> . |
| 178 | POPULATION NOT STRATIFIED OR BMI <30 kg/m <sup>2</sup> | Veras, L., Diniz-Sousa, F., Boppre, G. <i>et al.</i> Accelerometer-based prediction of skeletal mechanical loading during walking in normal weight to severely obese subjects. <i>Osteoporos Int</i> <b>31</b> , 1239–1250 (2020). <a href="https://doi.org/10.1007/s00198-020-05295-2">https://doi.org/10.1007/s00198-020-05295-2</a>                                           |
| 179 | OTHER FOCUS                                            | Veras L, Diniz-Sousa F, Boppre G, Moutinho-Ribeiro E, Resende-Coelho A, Devezas V, Santos-Sousa H, Preto J, Vilas-Boas JP, Machado L, Oliveira J, Fonseca H. Mechanical loading prediction through accelerometry data during walking and running. <i>Eur J Sport Sci</i> . 2022 Jul 15:1-18. doi: 10.1080/17461391.2022.2102437. Epub ahead of print. PMID: 35838070.            |
| 180 | POPULATION <18 YEARS                                   | Villarrasa-Sapiña I, Serra-Añó P, Pardo-Ibáñez A, Gonzalez LM, García-Massó X. Relationship between body composition and vertical ground reaction forces in obese children when walking. <i>Clin Biomech (Bristol, Avon)</i> . 2017 Jan;41:77-81. doi: 10.1016/j.clinbiomech.2016.12.008. Epub 2016 Dec 15. PMID: 28012303.                                                      |
| 181 | STUDY DESIGN                                           | Vismara L, Cimolin V, Menegoni F, Zaina F, Galli M, Negrini S, Villa V, Capodaglio P. Osteopathic manipulative treatment in obese patients with chronic low back pain: a pilot study. <i>Man Ther</i> . 2012 Oct;17(5):451-5. doi: 10.1016/j.math.2012.05.002. Epub 2012 May 31. PMID: 22658268.                                                                                 |
| 182 | POPULATION NOT STRATIFIED OR BMI <30 kg/m <sup>2</sup> | Walaszek MC, Ransom AL, Capehart S, Pohl MB, Shapiro R, Bollinger LM. External loading alters trunk kinematics and lower extremity muscle activity in a distribution-specific manner during sitting and rising from a chair. <i>J Electromyogr</i>                                                                                                                               |

|     |                                                           |                                                                                                                                                                                                                                                                                                                         |
|-----|-----------------------------------------------------------|-------------------------------------------------------------------------------------------------------------------------------------------------------------------------------------------------------------------------------------------------------------------------------------------------------------------------|
|     |                                                           | Kinesiol. 2017 Jun;34:102-108. doi: 10.1016/j.jelekin.2017.04.005. Epub 2017 Apr 23. PMID: 28460239.                                                                                                                                                                                                                    |
| 183 | POPULATION NOT STRATIFIED OR<br>BMI <30 kg/m <sup>2</sup> | Westlake CG, Milner CE, Zhang S, Fitzhugh EC. Do thigh circumference and mass changes alter knee biomechanics during walking? Gait Posture. 2013 Mar;37(3):359-62. doi: 10.1016/j.gaitpost.2012.07.031. Epub 2012 Aug 29. PMID: 22939753.                                                                               |
| 184 | OTHER FOCUS                                               | Whittaker RL, Vidt ME, Lockley RME, Mourtzakis M, Dickerson CR. Upper extremity and trunk body segment parameters are affected by BMI and sex. J Biomech. 2021 Mar 5;117:110230. doi: 10.1016/j.jbiomech.2021.110230. Epub 2021 Jan 9. PMID: 33493714.                                                                  |
| 185 | POPULATION <18 YEARS                                      | Wiesinger HP, Buchecker M, Müller E, Stöggl T, Birklbauer J. Decreased Postural Complexity in Overweight to Obese Children and Adolescents: A Cross-Sectional Study. Front Hum Neurosci. 2022 Apr 28;16:850548. doi: 10.3389/fnhum.2022.850548. PMID: 35572009; PMCID: PMC9097216.                                      |
| 186 | PUBLICATION TYPE                                          | Wu X, Yeoh HT, Soangra R, Lockhart TE. Investigation into the Functional Mobility Difference between Obese and Non-Obese Elderly. Proceedings of the Human Factors and Ergonomics Society Annual Meeting. 1 settembre 2012;56(1):1814–6.                                                                                |
| 187 | OTHER FOCUS                                               | Wu X, Lockhart TE, Yeoh HT. Effects of obesity on slip-induced fall risks among young male adults. J Biomech. 2012 Apr 5;45(6):1042-7. doi: 10.1016/j.jbiomech.2011.12.021. Epub 2012 Feb 2. PMID: 22304846; PMCID: PMC3310324.                                                                                         |
| 188 | PUBLICATION TYPE                                          | Z. Zhang and G. -Z. Yang, "Monitoring cardio-respiratory and posture movements during sleep: What can be achieved by a single motion sensor," <i>2015 IEEE 12th International Conference on Wearable and Implantable Body Sensor Networks (BSN)</i> , Cambridge, MA, USA, 2015, pp. 1-6, doi: 10.1109/BSN.2015.7299409. |
| 189 | POPULATION NOT STRATIFIED OR<br>BMI <30 kg/m <sup>2</sup> | <b>Glave, A. P.,</b> Di Brezzo, R., Applegate, D. K., & Olson, J.M. (2013). The effects of weight and activity on select kinematic gait variables in adult females. <i>Journal of Physical Education and Sport</i> , 13(4), 471-478. doi: <b>10.7752/jpes.2013.04075</b>                                                |
